# Supplementary material for: Incidence, Microbiological Studies, and Factors Associated With Prosthetic Joint Infection After Total Knee Arthroplasty
Source: PubMed Central journal article supplement (PMC10618849; doi:10.1001/jamanetworkopen.2023.40457), 2023-10-31
Supplement: jamanetwopen-e2340457-s001.pdf [file jamanetwopen-e2340457-s001.pdf]

## Supplemental Online Content

Weinstein EJ, Stephens-Shields A, Newcomb CW, et al. Incidence, microbiological studies, and factors associated with prosthetic joint infection after total knee arthroplasty. *JAMA Netw Open*. 2023;6(10):e2340457. doi:10.1001/jamanetworkopen.2023.40457

**eTable 1.** Diagnosis and Procedures Codes Used to Define Inclusion and Exclusion Criteria, Prosthetic Joint Infection Outcomes, and Censoring Events

**eFigure 1.** Validated Case-Finding Algorithms Used to Identify Prosthetic Joint Infection After Total Knee Arthroplasty Within United States Veterans Health Administration Data

**eTable 2.** Definitions of Medical Comorbidities and Surgical Characteristics as well as ICD-9 and ICD-10 Diagnosis Codes Used to Identify Comorbidities of Interest

**eFigure 2.** Hierarchy Used for Organization of Microbiological Culture Data

**eTable 3.** Baseline Demographics, Medical Comorbidities, and Surgical Characteristics at Time of Total Knee Arthroplasty Among Those Not in the Veterans Affairs Surgical Quality Improvement Program Compared to Patients Included in This Cohort

**eTable 4.** Adjusted Incidence Rate Ratios of Prosthetic Joint Infection at Any Time After Primary Total Knee Arthroplasty Associated With Demographic, Baseline Clinical, and Peri-Operative Factors Among Patients Included in the Veterans Affairs Surgical Quality Improvement Project (n=61,701)

This supplemental material has been provided by the authors to give readers additional information about their work.

**eTable 1.** Diagnosis and procedures codes used to define inclusion and exclusion criteria, prosthetic joint infection outcomes, and censoring events.

| Code    | Code Type | Applicability | Description                                                                                                          | Applicable time relative to index TKA (Day 0) |
|---------|-----------|---------------|----------------------------------------------------------------------------------------------------------------------|-----------------------------------------------|
| 81.54   | ICD-9     | Inclusion     | Total knee replacement                                                                                               | NA                                            |
| 0SRDxxx | ICD-10    | Inclusion     | Replacement of left knee joint, various components, and materials                                                    | NA                                            |
| 0SRCxxx | ICD-10    | Inclusion     | Replacement of right knee joint, various components, and materials                                                   | NA                                            |
| 27437   | CPT       | Exclusion     | Revise kneecap                                                                                                       | Day 0 or any time prior                       |
| 27438   | CPT       | Exclusion     | Partial TKA with or without prosthesis                                                                               | Day 0 or any time prior                       |
| 27440   | CPT       | Exclusion     | Partial TKA with or without prosthesis                                                                               | Day 0 or any time prior                       |
| 27441   | CPT       | Exclusion     | Partial TKA with or without prosthesis                                                                               | Day 0 or any time prior                       |
| 27442   | CPT       | Exclusion     | Partial TKA with or without prosthesis                                                                               | Day 0 or any time prior                       |
| 27443   | CPT       | Exclusion     | Partial TKA with or without prosthesis                                                                               | Day 0 or any time prior                       |
| 27444   | CPT       | Exclusion     | Partial TKA with or without prosthesis                                                                               | Day 0 or any time prior                       |
| 27445   | CPT       | Exclusion     | Partial TKA with or without prosthesis                                                                               | Day 0 or any time prior                       |
| 27446   | CPT       | Exclusion     | Partial TKA with or without prosthesis                                                                               | Day 0 or any time prior                       |
| 27486   | CPT       | Exclusion     | Revision of total knee arthroplasty, with or without allograft; 1 or more components                                 | Day 0 or any time prior                       |
| 27487   | CPT       | Exclusion     | Revision of total knee arthroplasty, with or without allograft; 1 or more components                                 | Day 0 or any time prior                       |
| 27488   | CPT       | Exclusion     | Removal of prosthesis, including total knee prosthesis, methylmethacrylate with or without insertion of spacer, knee | Day 0 or any time prior                       |
| 27132   | CPT       | Exclusion     | Conversion from hemiarthroplasty                                                                                     | Day 0 or any time prior                       |
| 80.06   | ICD-9     | Exclusion     | Removal of knee prosthesis                                                                                           | Day 0 or any time prior                       |
| 81.55   | ICD-9     | Exclusion     | Revision of knee replacement NOS                                                                                     | Day 0 or any time prior                       |
| 00.80   | ICD-9     | Exclusion     | Revision of knee replacement, total (all components)                                                                 | Day 0 or any time prior                       |
| 00.81   | ICD-9     | Exclusion     | Revision of knee replacement, tibial component                                                                       | Day 0 or any time prior                       |
| 00.82   | ICD-9     | Exclusion     | Revision of knee replacement, femoral component                                                                      | Day 0 or any time prior                       |
| 00.83   | ICD-9     | Exclusion     | Revision of knee replacement, patellar component                                                                     | Day 0 or any time prior                       |
| 00.84   | ICD-9     | Exclusion     | Revision of total knee replacement, tibial insert (liner)                                                            | Day 0 or any time prior                       |
| 0SWCxxx | ICD-10    | Exclusion     | Revision of right knee Joint, various approaches                                                                     | Day 0 or any time prior                       |
| 0SWDxxx | ICD-10    | Exclusion     | Revision of left knee joint, various approaches                                                                      | Day 0 or any time prior                       |
| 0SWSxxx | ICD-10    | Exclusion     | Revision of left knee joint, various approaches                                                                      | Day 0 or any time prior                       |
| 0SWTxxx | ICD-10    | Exclusion     | Revision of right knee Joint, various approaches                                                                     | Day 0 or any time prior                       |

| Code        | Code Type | Applicability | Description                                                                                                          | Applicable time relative to index TKA (Day 0) |
|-------------|-----------|---------------|----------------------------------------------------------------------------------------------------------------------|-----------------------------------------------|
| 0SWUxxx     | ICD-10    | Exclusion     | Revision of synthetic substitute, left knee joint, femoral surface, various approaches                               | Day 0 or any time prior                       |
| 0SWVxxx     | ICD-10    | Exclusion     | Revision of right knee Joint, various approaches                                                                     | Day 0 or any time prior                       |
| 0SWWxx<br>x | ICD-10    | Exclusion     | Revision of left knee joint, various approaches                                                                      | Day 0 or any time prior                       |
| 0SPCxxx     | ICD-10    | Exclusion     | Removal of device (spacer, synthetic substitute, or liner) from right knee joint, various approaches                 | Day 0 or any time prior                       |
| 0SPDxxx     | ICD-10    | Exclusion     | Removal of device (spacer, synthetic substitute, or liner) from left knee joint, various approaches                  | Day 0 or any time prior                       |
| 11981       | CPT       | Exclusion     | Spacer insertion                                                                                                     | Day 0 or any time prior                       |
| 11982       | CPT       | Exclusion     | Spacer removal/removal with re-insertion                                                                             | Day 0 or any time prior                       |
| 11983       | CPT       | Exclusion     | Spacer removal/removal with re-insertion                                                                             | Day 0 or any time prior                       |
| 996.60      | ICD-9     | Exclusion     | Infection and inflammatory reaction due to unspecified device, implant, and graft                                    | Day 0 or any time prior                       |
| 996.66      | ICD-9     | Exclusion     | Infection due to internal prosthesis (prosthetic joint infection)                                                    | Day 0 or any time prior                       |
| 996.67      | ICD-9     | Exclusion     | Infection and inflammatory reaction due to other internal orthopedic device, implant, and graft device/implant/graft | Day 0 or any time prior                       |
| 996.69      | ICD-9     | Exclusion     | Infection and inflammatory reaction due to other internal prosthetic device, implant, and graft                      | Day 0 or any time prior                       |
| 711.06      | ICD-9     | Exclusion     | Septic arthritis (native joint) lower leg                                                                            | Day 0 or any time prior                       |
| 711.08      | ICD-9     | Exclusion     | Septic arthritis, other specified sites, or multiple sites                                                           | Day 0 or any time prior                       |
| 711.09      | ICD-9     | Exclusion     | Septic arthritis, other specified sites, or multiple sites                                                           | Day 0 or any time prior                       |
| 711.96      | ICD-9     | Exclusion     | Septic arthritis (native joint) lower leg                                                                            | Day 0 or any time prior                       |
| 170.7x      | ICD-9     | Exclusion     | Malignant neoplasm of long bones of lower limb                                                                       | During index hospitalization                  |
| 170.8x      | ICD-9     | Exclusion     | Malignant neoplasm of bone and articular cartilage                                                                   | During index hospitalization                  |
| 170.9x      | ICD-9     | Exclusion     | malignant neoplasm of bone and articular cartilage, site unspecified                                                 | During index hospitalization                  |
| 198.5x      | ICD-9     | Exclusion     | secondary neoplasm of bone and bone marrow                                                                           | During index hospitalization                  |
| 733.10      | ICD-9     | Exclusion     | Pathologic fracture, site unspecified                                                                                | During index hospitalization                  |
| 733.15      | ICD-9     | Exclusion     | Pathologic fracture of other specified part of femur                                                                 | During index hospitalization                  |
| 733.16      | ICD-9     | Exclusion     | Pathologic fracture of tibia or fibula                                                                               | During index hospitalization                  |
| 733.19      | ICD-9     | Exclusion     | Pathologic fracture of another specified site                                                                        | During index hospitalization                  |
| 821.xx      | ICD-9     | Exclusion     | Fracture of other and unspecified parts of femur                                                                     | During index hospitalization                  |
| 822.xx      | ICD-9     | Exclusion     | Fracture of patella                                                                                                  | During index hospitalization                  |

| Code     | Code Type | Applicability | Description                                                                                                    | Applicable time relative to index TKA (Day 0) |
|----------|-----------|---------------|----------------------------------------------------------------------------------------------------------------|-----------------------------------------------|
| 823.xx   | ICD-9     | Exclusion     | Fracture of tibia and fibula                                                                                   | During index hospitalization                  |
| 827.xx   | ICD-9     | Exclusion     | Other, multiple, and ill-defined fractures of lower limb                                                       | During index hospitalization                  |
| 828.xx   | ICD-9     | Exclusion     | Multiple fractures involving both lower limbs, lower with upper limb and lower limb(s) with rib(s) and sternum | During index hospitalization                  |
| 829.xx   | ICD-9     | Exclusion     | Fracture of unspecified bones                                                                                  | During index hospitalization                  |
| T84.50xx | ICD-10    | Exclusion     | Joint or orthopedic prosthesis infection unspecified prosthesis                                                | Day 0 or any time prior                       |
| T84.53xx | ICD-10    | Exclusion     | Infection and inflammatory reaction due to internal right knee prosthesis                                      | Day 0 or any time prior                       |
| T84.54xx | ICD-10    | Exclusion     | Infection and inflammatory reaction due to internal left knee prosthesis                                       | Day 0 or any time prior                       |
| T84.59xx | ICD-10    | Exclusion     | Joint or orthopedic prosthesis infection unspecified prosthesis                                                | Day 0 or any time prior                       |
| T84.7xxx | ICD-10    | Exclusion     | Infection and inflammatory reaction due to other internal orthopedic prosthetic devices, implants, and grafts  | Day 0 or any time prior                       |
| M00.06x  | ICD-10    | Exclusion     | Staphylococcal arthritis, knee                                                                                 | Day 0 or any time prior                       |
| M00.16x  | ICD-10    | Exclusion     | Pneumococcal arthritis, knee                                                                                   | Day 0 or any time prior                       |
| M00.26x  | ICD-10    | Exclusion     | Other streptococcal arthritis, knee                                                                            | Day 0 or any time prior                       |
| M00.86x  | ICD-10    | Exclusion     | Arthritis due to other bacteria, knee                                                                          | Day 0 or any time prior                       |
| C40.2x   | ICD-10    | Exclusion     | Malignant neoplasm of long bones of lower limb                                                                 | During index hospitalization                  |
| C40.3x   | ICD-10    | Exclusion     | Malignant neoplasm of short bones of lower limb                                                                | During index hospitalization                  |
| C40.8x   | ICD-10    | Exclusion     | Malignant neoplasm of overlapping sites of bone and articular cartilage of limb                                | During index hospitalization                  |
| C40.9x   | ICD-10    | Exclusion     | Malignant neoplasm of unspecified bones and articular cartilage of limb                                        | During index hospitalization                  |
| C41.9x   | ICD-10    | Exclusion     | Malignant neoplasm of bone and articular cartilage, unspecified                                                | During index hospitalization                  |
| C79.5x   | ICD-10    | Exclusion     | Secondary malignant neoplasm of bone and bone marrow                                                           | During index hospitalization                  |
| M84.40x  | ICD-10    | Exclusion     | Pathologic fracture, unspecified site                                                                          | During index hospitalization                  |
| M84.45x  | ICD-10    | Exclusion     | Pathologic fracture, femur, and pelvis                                                                         | During index hospitalization                  |
| M84.46x  | ICD-10    | Exclusion     | Pathologic fracture, tib/fib                                                                                   | During index hospitalization                  |
| M84.48x  | ICD-10    | Exclusion     | Pathologic fracture, other site                                                                                | During index hospitalization                  |
| S82.0x   | ICD-10    | Exclusion     | Fracture of patella                                                                                            | During index hospitalization                  |
| S82.1x   | ICD-10    | Exclusion     | Fracture of upper end of tibia                                                                                 | During index hospitalization                  |
| S82.2x   | ICD-10    | Exclusion     | Fracture of shaft of tibia                                                                                     | During index hospitalization                  |
| S82.3x   | ICD-10    | Exclusion     | Fracture of lower end of tibia                                                                                 | During index hospitalization                  |
| S82.4x   | ICD-10    | Exclusion     | Fracture of shaft of fibula                                                                                    | During index hospitalization                  |

| Code     | Code Type | Applicability | Description                                                                                                          | Applicable time relative to index TKA (Day 0) |
|----------|-----------|---------------|----------------------------------------------------------------------------------------------------------------------|-----------------------------------------------|
| S82.8x   | ICD-10    | Exclusion     | Other fractures of lower leg                                                                                         | During index hospitalization                  |
| S82.9x   | ICD-10    | Exclusion     | Unspecified fracture of lower leg                                                                                    | During index hospitalization                  |
| 996.60   | ICD-9     | Outcome (PJI) | Infection and inflammatory reaction due to unspecified device, implant, and graft                                    | After Day 0                                   |
| 996.66   | ICD-9     | Outcome (PJI) | Infection due to internal prosthesis (prosthetic joint infection)                                                    | After Day 0                                   |
| 996.67   | ICD-9     | Outcome (PJI) | Infection and inflammatory reaction due to other internal orthopedic device, implant, and graft device/implant/graft | After Day 0                                   |
| 996.69   | ICD-9     | Outcome (PJI) | Infection and inflammatory reaction due to other internal prosthetic device, implant, and graft                      | After Day 0                                   |
| T81.42XA | ICD-10    | Outcome (PJI) | Infection following a procedure, deep incisional surgical site, initial encounter                                    | After Day 0                                   |
| T81.43XA | ICD-10    | Outcome (PJI) | Infection following a procedure, organ and space surgical site, initial encounter                                    | After Day 0                                   |
| T84.50xx | ICD-10    | Outcome (PJI) | Joint or orthopedic prosthesis infection unspecified prosthesis                                                      | After Day 0                                   |
| T84.53xx | ICD-10    | Outcome (PJI) | Infection and inflammatory reaction due to internal right knee prosthesis                                            | After Day 0                                   |
| T84.54xx | ICD-10    | Outcome (PJI) | Infection and inflammatory reaction due to internal left knee prosthesis                                             | After Day 0                                   |
| T84.59xx | ICD-10    | Outcome (PJI) | Joint or orthopedic prosthesis infection unspecified prosthesis                                                      | After Day 0                                   |
| T84.7xxx | ICD-10    | Outcome (PJI) | Infection and inflammatory reaction due to other internal orthopedic prosthetic devices, implants, and grafts        | After Day 0                                   |
| T85.79XA | ICD-10    | Outcome (PJI) | Infection due to other internal prosthetic devices, implants and grafts, initial encounter                           | After Day 0                                   |
| 73560    | CPT       | Outcome (PJI) | X-ray knee 1 or 2 views                                                                                              | +/- 90 days from PJI dx                       |
| 73562    | CPT       | Outcome (PJI) | X-ray knee 3 views                                                                                                   | +/- 90 days from PJI dx                       |
| 73564    | CPT       | Outcome (PJI) | X-ray knee 4 views                                                                                                   | +/- 90 days from PJI dx                       |
| 73565    | CPT       | Outcome (PJI) | X-ray knee bilateral standing                                                                                        | +/- 90 days from PJI dx                       |
| 73580    | CPT       | Outcome (PJI) | X-ray knee arthrography                                                                                              | +/- 90 days from PJI dx                       |
| 20610    | CPT       | Outcome (PJI) | Arthrocentesis, aspiration and/or injection; major joint                                                             | +/- 90 days from PJI dx                       |
| 20611    | CPT       | Outcome (PJI) | Arthrocentesis, aspiration and/or injection; major joint, ultrasound guided                                          | +/- 90 days from PJI dx                       |
| 27310    | CPT       | Outcome (PJI) | Arthrotomy, knee, with exploration, drainage, or removal of foreign body (e.g., infection)                           | +/- 90 days from PJI dx                       |
| 27330    | CPT       | Outcome (PJI) | Arthrotomy, knee; with synovial biopsy only                                                                          | +/- 90 days from PJI dx                       |
| 27331    | CPT       | Outcome (PJI) | Arthrotomy, knee; including joint exploration, biopsy, or removal of loose or foreign bodies                         | +/- 90 days from PJI dx                       |
| 27334    | CPT       | Outcome (PJI) | Arthrotomy, with synovectomy, knee; anterior or posterior                                                            | +/- 90 days from PJI dx                       |

| Code    | Code Type | Applicability | Description                                                                                                          | Applicable time relative to index TKA (Day 0) |
|---------|-----------|---------------|----------------------------------------------------------------------------------------------------------------------|-----------------------------------------------|
| 27335   | CPT       | Outcome (PJI) | Arthrotomy, with synovectomy, knee; anterior and posterior including popliteal area                                  | +/- 90 days from PJI dx                       |
| 87040   | CPT       | Outcome (PJI) | Culture, bacterial; blood, with isolation and presumptive identification of isolates                                 | +/- 90 days from PJI dx                       |
| 87999   | CPT       | Outcome (PJI) | Unlisted microbiology procedure                                                                                      | +/- 90 days from PJI dx                       |
| 27437   | CPT       | Censor        | Partial TKA with or without prosthesis                                                                               | After Day 0                                   |
| 27438   | CPT       | Censor        | Partial TKA with or without prosthesis                                                                               | After Day 0                                   |
| 27440   | CPT       | Censor        | Partial TKA with or without prosthesis                                                                               | After Day 0                                   |
| 27441   | CPT       | Censor        | Partial TKA with or without prosthesis                                                                               | After Day 0                                   |
| 27442   | CPT       | Censor        | Partial TKA with or without prosthesis                                                                               | After Day 0                                   |
| 27443   | CPT       | Censor        | Partial TKA with or without prosthesis                                                                               | After Day 0                                   |
| 27444   | CPT       | Censor        | Partial TKA with or without prosthesis                                                                               | After Day 0                                   |
| 27445   | CPT       | Censor        | Partial TKA with or without prosthesis                                                                               | After Day 0                                   |
| 27446   | CPT       | Censor        | Partial TKA with or without prosthesis                                                                               | After Day 0                                   |
| 27447   | CPT       | Censor        | Total knee arthroplasty                                                                                              | After Day 0                                   |
| 27486   | CPT       | Censor        | Revision of total knee arthroplasty, with or without allograft; 1 or more components                                 | After Day 0                                   |
| 27487   | CPT       | Censor        | Revision of total knee arthroplasty, with or without allograft; 1 or more components                                 | After Day 0                                   |
| 27488   | CPT       | Censor        | Removal of prosthesis, including total knee prosthesis, methylmethacrylate with or without insertion of spacer, knee | After Day 0                                   |
| 80.06   | ICD-9     | Censor        | Removal of knee prosthesis                                                                                           | After Day 0                                   |
| 81.54   | ICD-9     | Censor        | Total knee replacement                                                                                               | After Day 0                                   |
| 81.55   | ICD-9     | Censor        | Revision of knee replacement NOS                                                                                     | After Day 0                                   |
| 00.80   | ICD-9     | Censor        | Revision of knee replacement, total (all components)                                                                 | After Day 0                                   |
| 00.81   | ICD-9     | Censor        | Revision of knee replacement, tibial component                                                                       | After Day 0                                   |
| 00.82   | ICD-9     | Censor        | Revision of knee replacement, femoral component                                                                      | After Day 0                                   |
| 00.83   | ICD-9     | Censor        | Revision of knee replacement, patellar component                                                                     | After Day 0                                   |
| 00.84   | ICD-9     | Censor        | Revision of total knee replacement, tibial insert (liner)                                                            | After Day 0                                   |
| 0SRDxxx | ICD-10    | Censor        | Replacement of left knee joint, various components, and materials                                                    | After Day 0                                   |
| 0SRCxxx | ICD-10    | Censor        | Replacement of right knee joint, various components, and materials                                                   | After Day 0                                   |
| 0SRTxxx | ICD-10    | Censor        | Replacement of right knee joint, various components, and materials                                                   | After Day 0                                   |
| 0SRUxxx | ICD-10    | Censor        | Replacement of left knee joint, various components, and materials                                                    | After Day 0                                   |
| 0SRVxxx | ICD-10    | Censor        | Replacement of right knee joint, various components, and materials                                                   | After Day 0                                   |

| <b>Code</b> | <b>Code Type</b> | <b>Applicability</b> | <b>Description</b>                                                                                   | <b>Applicable time relative to index TKA (Day 0)</b> |
|-------------|------------------|----------------------|------------------------------------------------------------------------------------------------------|------------------------------------------------------|
| 0SRWxxx     | ICD-10           | Censor               | Replacement of left knee joint, various components, and materials                                    | After Day 0                                          |
| 0SWCxxx     | ICD-10           | Censor               | Revision of right knee Joint, various approaches                                                     | After Day 0                                          |
| 0SWDxxx     | ICD-10           | Censor               | Revision of left knee joint, various approaches                                                      | After Day 0                                          |
| 0SWSxxx     | ICD-10           | Censor               | Revision of left knee joint, various approaches                                                      | After Day 0                                          |
| 0SWTxxx     | ICD-10           | Censor               | Revision of right knee Joint, various approaches                                                     | After Day 0                                          |
| 0SWVxxx     | ICD-10           | Censor               | Revision of right knee Joint, various approaches                                                     | After Day 0                                          |
| 0SWWxx<br>x | ICD-10           | Censor               | Revision of left knee joint, various approaches                                                      | After Day 0                                          |
| 0SPCxxx     | ICD-10           | Censor               | Removal of device (spacer, synthetic substitute, or liner) from right knee joint, various approaches | After Day 0                                          |
| 0SPDxxx     | ICD-10           | Censor               | Removal of device (spacer, synthetic substitute, or liner) from left knee joint, various approaches  | After Day 0                                          |

**eFigure 1.** Validated case-finding algorithms used to identify prosthetic joint infection after total knee arthroplasty within United States Veterans Health Administration data.

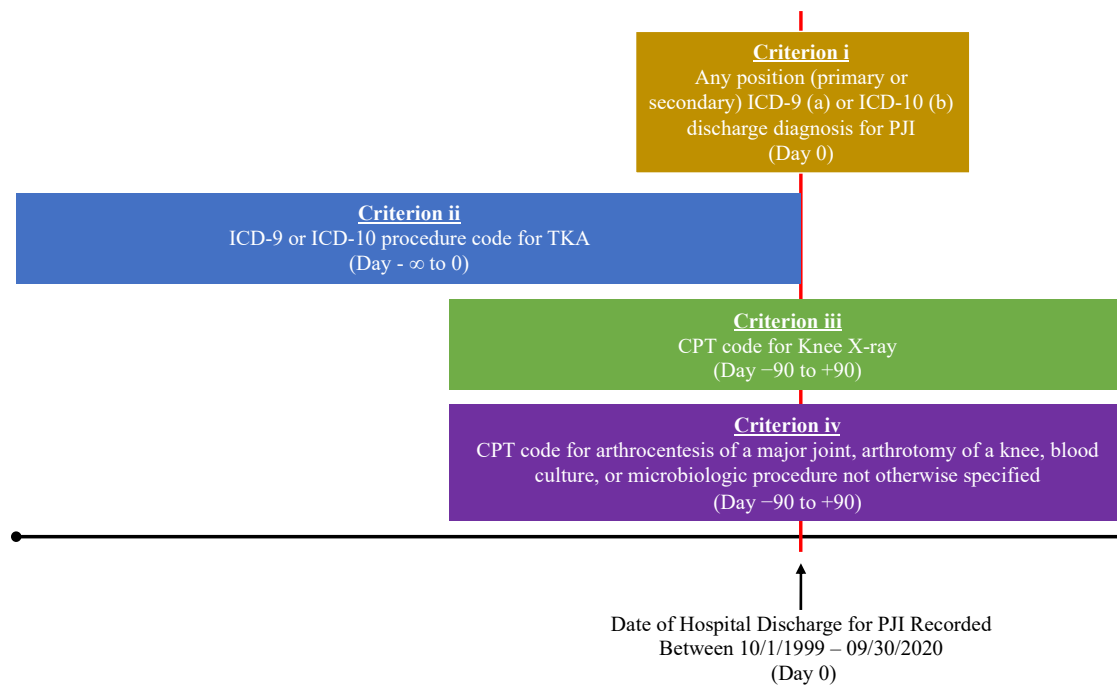

**PJI Case-Finding Algorithms:** Criteria i(a or b) + ii + iii + iv

**Abbreviations:** ICD, International Classification of Diseases; PJI, prosthetic joint infection; TKA, total knee arthroplasty. CPT



**eTable 2.** Definitions of medical comorbidities and surgical characteristics as well as ICD-9 and ICD-10 diagnosis codes used to identify comorbidities of interest.

Alcohol abuse, heart failure, hypertension, diabetes mellitus, peripheral artery disease, HIV infection, HCV infection, HBV infection were defined by the presence of 1 inpatient or 2 outpatient ICD-9/-10 diagnosis codes. Autoimmune inflammatory arthritis was defined as 1 inpatient or 2 outpatient ICD-9/-10 codes among patients with at least one outpatient rheumatologic clinic visit during the baseline period. Anemia was defined as a hemoglobin <12 g/dL. Chronic kidney disease was defined by an estimated glomerular filtration rate (eGFR) of <60 (mL/min/1.73 m<sup>2</sup>). eGFR was calculated using the Modification of Diet in Renal Disease equation:  $175 \times (\text{serum creatinine})^{-1.154} \times (\text{age})^{-0.203} \times (0.742, \text{ if female}) \times (1.212, \text{ if Black})$ . Steroid use was ascertained from Veterans Affairs Surgical Quality Improvement Program (VASQIP) which documents the regular administration or oral or parenteral steroid use for a chronic condition in the 30-days preoperatively and excludes topical corticosteroids applied to the skin or inhaled or rectal steroids as well as patients receiving pulse-dose steroids only immediately prior to surgery. Anesthesia technique was the principal anesthesia technique utilized for surgery, categorized as general versus regional. Operative time was recorded in minutes, and a prolonged operative time was defined by  $\geq 120$  minutes.

| Comorbidity               | Codes                                                                                                                                                                                                                                                                                                                                                                                                                                                                                                                                                                                                                                                                                                                                                                                                                                                                                                                                                                                                                                                                                                                                                                                                                                                                                                                                                                                                                                                                                                                                                                             |
|---------------------------|-----------------------------------------------------------------------------------------------------------------------------------------------------------------------------------------------------------------------------------------------------------------------------------------------------------------------------------------------------------------------------------------------------------------------------------------------------------------------------------------------------------------------------------------------------------------------------------------------------------------------------------------------------------------------------------------------------------------------------------------------------------------------------------------------------------------------------------------------------------------------------------------------------------------------------------------------------------------------------------------------------------------------------------------------------------------------------------------------------------------------------------------------------------------------------------------------------------------------------------------------------------------------------------------------------------------------------------------------------------------------------------------------------------------------------------------------------------------------------------------------------------------------------------------------------------------------------------|
| Alcohol dependence/abuse  | <p>ICD-9: 303.00, 303.01, 303.02, 303.03, 303.90, 303.91, 303.92, 303.93, 305.00, 305.01, 305.02, 305.03,</p> <p>ICD-10: F10.10, F10.11, F10.120, F10.121, F10.129, F10.130, F10.131, F10.132, F10.139, F10.14, F10.150, F10.151, F10.159, F10.180, F10.181, F10.182, F10.188, F10.19, F10.20, F10.21, F10.220, F10.221, F10.229, F10.230, F10.231, F10.232, F10.239, F10.24, F10.250, F10.251, F10.259, F10.26, F10.27, F10.280, F10.281, F10.282, F10.288, F10.29</p>                                                                                                                                                                                                                                                                                                                                                                                                                                                                                                                                                                                                                                                                                                                                                                                                                                                                                                                                                                                                                                                                                                           |
| Heart failure             | <p>ICD-9: 402.01, 402.11, 402.91, 404.01, 404.03, 404.11, 404.13, 404.91, 404.93, 428.XX</p> <p>ICD-10: I09.81, I10.0, I13.0, I25.5, I50.X</p>                                                                                                                                                                                                                                                                                                                                                                                                                                                                                                                                                                                                                                                                                                                                                                                                                                                                                                                                                                                                                                                                                                                                                                                                                                                                                                                                                                                                                                    |
| Hypertension              | <p>ICD-9: 401.0, 401.1, 401.9, 402.00, 402.01, 402.10, 402.11, 402.90, 402.91, 403.0, 403.00, 403.01, 403.1, 403.10, 403.11, 403.9, 403.90, 403.91, 404.0, 404.00, 404.01, 404.02, 404.03, 404.1, 404.10, 404.11, 404.12, 404.13, 404.9, 404.90, 404.91, 404.92, 404.93, 405.01, 405.09, 405.11, 405.19, 405.91, 405.99, 437.2</p> <p>ICD-10: I10.X, I11.0, I11.9, I12.0, I12.9, I13.0, I13.10, I13.11, I13.2, I15.0, I15.1, I15.2, I15.8, I15.9, I16.0, I16.1, I16.9, I67.4</p>                                                                                                                                                                                                                                                                                                                                                                                                                                                                                                                                                                                                                                                                                                                                                                                                                                                                                                                                                                                                                                                                                                  |
| Diabetes mellitus         | <p>ICD-9: 250.XX, 357.20</p> <p>ICD-10: E10.XX, E11.XX, E12.XX, E13.XX, E14.XX, Z46.81, X96.41</p>                                                                                                                                                                                                                                                                                                                                                                                                                                                                                                                                                                                                                                                                                                                                                                                                                                                                                                                                                                                                                                                                                                                                                                                                                                                                                                                                                                                                                                                                                |
| Peripheral artery disease | <p>ICD-9: 441.0, 441.00, 441.01, 441.02, 441.03, 441.1, 441.2, 441.3, 441.4, 441.5, 441.6, 441.7, 441.9, 443.81, 443.89, 443.9, 785.4, V43.4</p> <p>ICD-10: , I70.0, I70.1, I70.201, I70.202, I70.203, I70.208, I70.209, I70.211, I70.212, I70.213, I70.218, I70.219, I70.221, I70.222, I70.223, I70.228, I70.229, I70.231, I70.232, I70.233, I70.234, I70.235, I70.238, I70.239, I70.241, I70.242, I70.243, I70.244, I70.245, I70.248, I70.249, I70.25, I70.261, I70.262, I70.263, I70.268, I70.269, I70.291, I70.292, I70.293, I70.298, I70.299, I70.301, I70.302, I70.303, I70.308, I70.309, I70.311, I70.312, I70.313, I70.318, I70.319, I70.321, I70.322, I70.323, I70.328, I70.329, I70.331, I70.332, I70.333, I70.334, I70.335, I70.338, I70.339, I70.341, I70.342, I70.343, I70.344, I70.345, I70.348, I70.349, I70.35, I70.361, I70.362, I70.363, I70.368, I70.369, I70.391, I70.392, I70.393, I70.398, I70.399, I70.401, I70.402, I70.403, I70.408, I70.409, I70.411, I70.412, I70.413, I70.418, I70.419, I70.421, I70.422, I70.423, I70.428, I70.429, I70.431, I70.432, I70.433, I70.434, I70.435, I70.438, I70.439, I70.441, I70.442, I70.443, I70.444, I70.445, I70.448, I70.449, I70.45, I70.461, I70.462, I70.463, I70.468, I70.469, I70.491, I70.492, I70.493, I70.498, I70.499, I70.501, I70.502, I70.503, I70.508, I70.509, I70.511, I70.512, I70.513, I70.518, I70.519, I70.521, I70.522, I70.523, I70.528, I70.529, I70.531, I70.532, I70.533, I70.534, I70.535, ICD_DX, I70.538, I70.539, I70.541, I70.542, I70.543, I70.544, I70.545, I70.548, I70.549,</p> |

| Comorbidity                            | Codes                                                                                                                                                                                                                                                                                                                                                                                                                                                                                                                                                                                                                                                                                                                                                                                                                                                                                                                                                                                                                                                   |
|----------------------------------------|---------------------------------------------------------------------------------------------------------------------------------------------------------------------------------------------------------------------------------------------------------------------------------------------------------------------------------------------------------------------------------------------------------------------------------------------------------------------------------------------------------------------------------------------------------------------------------------------------------------------------------------------------------------------------------------------------------------------------------------------------------------------------------------------------------------------------------------------------------------------------------------------------------------------------------------------------------------------------------------------------------------------------------------------------------|
|                                        | I70.55, I70.561, I70.562, I70.563, I70.568, I70.569, I70.591, I70.592, I70.593, I70.598, I70.599, I70.601, I70.602, I70.603, I70.608, I70.609, I70.611, I70.612, I70.613, I70.618, I70.619, I70.621, I70.622, I70.623, I70.628, I70.629, I70.631, I70.632, I70.633, I70.634, I70.635, I70.638, I70.639, I70.641, I70.642, I70.643, I70.644, I70.645, I70.648, I70.649, I70.65, I70.661, I70.662, I70.663, I70.668, I70.669, I70.691, I70.692, I70.693, I70.698, I70.699, I70.701, I70.702, I70.703, I70.708, I70.709, I70.711, I70.712, I70.713, I70.718, I70.719, I70.721, I70.722, I70.723, I70.728, I70.729, I70.731, I70.732, I70.733, I70.734, I70.735, I70.738, I70.739, I70.741, I70.742, I70.743, I70.744, I70.745, I70.748, I70.749, I70.75, I70.761, I70.762, I70.763, I70.768, I70.769, I70.791, I70.792, I70.793, I70.798, I70.799, I70.8, I70.90, I70.91, I70.92, I71.00, I71.01, I71.02, I71.03, I71.1, I71.2, I71.3, I71.4, I71.5, I71.6, I71.8, I71.9, I73.89, I73.9, I77.1, I79.0, I79.8, K55.1, K55.8, K55.9, Z95.820, Z95.828, Z95.9 |
| Human immunodeficiency virus infection | ICD-9: 042.0, 042.1 042.2, 042.9, V08, , ICD-10: B20                                                                                                                                                                                                                                                                                                                                                                                                                                                                                                                                                                                                                                                                                                                                                                                                                                                                                                                                                                                                    |
| Hepatitis C virus infection            | ICD-9: 70.41, 70.44, 70.51, 70.54, 70.70, 70.71, V02.62<br>ICD-10: B18.2, B19.20, B19.21, Z22.52                                                                                                                                                                                                                                                                                                                                                                                                                                                                                                                                                                                                                                                                                                                                                                                                                                                                                                                                                        |
| Hepatitis B virus infection            | ICD-9: 70.20, 70.21, 70.22, 70.23, 70.30, 70.31, 70.32, 70.33, V02.61<br>ICD-10: B18.0, B18.1, B19.1, Z22.51                                                                                                                                                                                                                                                                                                                                                                                                                                                                                                                                                                                                                                                                                                                                                                                                                                                                                                                                            |
| Autoimmune inflammatory arthritis      | ICD-9: 714.X, 696.00, 713.3, 720.00<br>ICD-10: M05.X, M06.X, L40.50, L40.52, L40.53, L40.59, M45.X                                                                                                                                                                                                                                                                                                                                                                                                                                                                                                                                                                                                                                                                                                                                                                                                                                                                                                                                                      |

**eFigure 2.** Hierarchy used for organization of microbiological culture data.

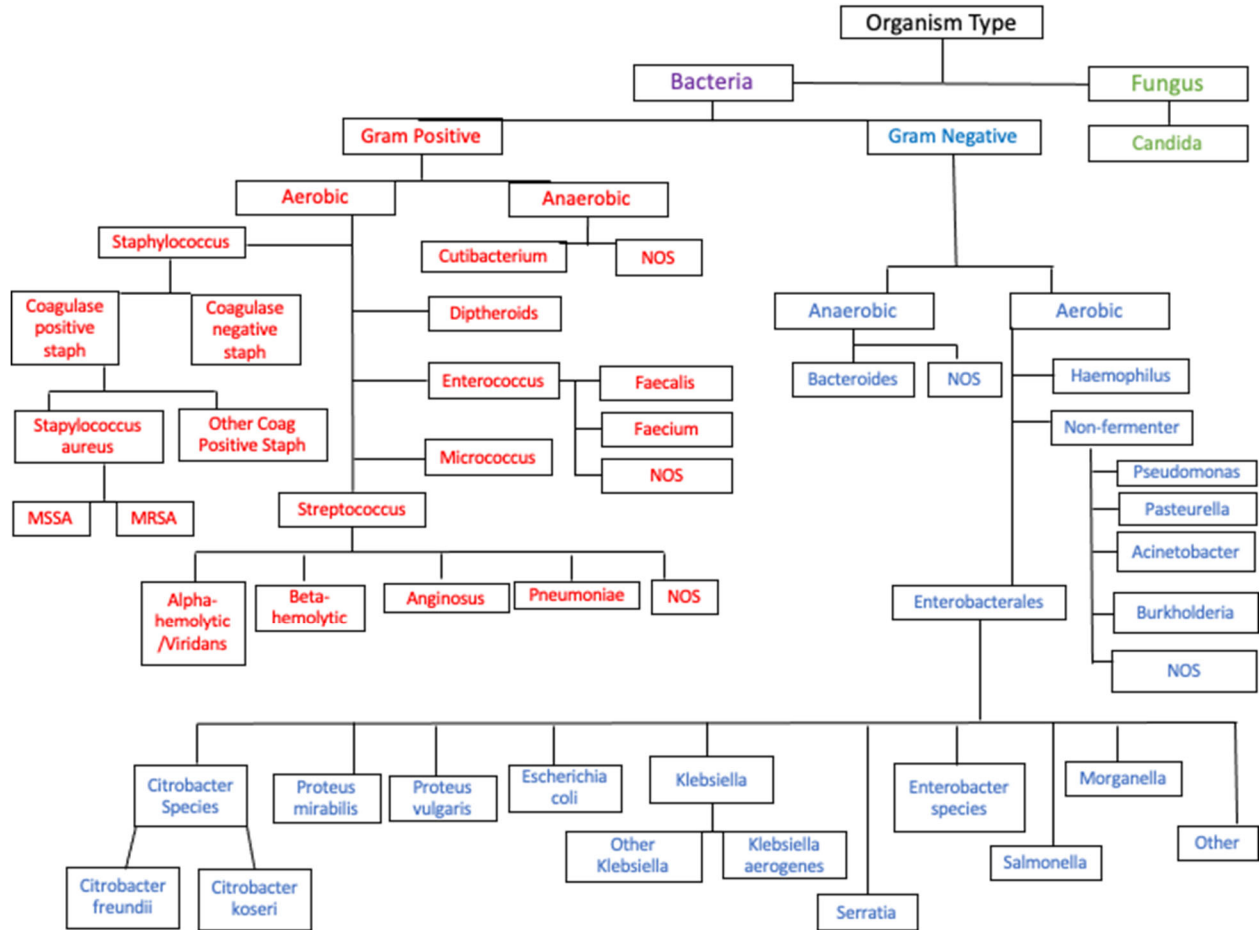

**eTable 3.** Baseline demographics, medical comorbidities, and surgical characteristics at time of total knee arthroplasty among those not in the Veterans Affairs Surgical Quality Improvement Program compared to patients included in this cohort.

| Characteristic <sup>a</sup>              | Non-VASQIP<br>(n=14,179)<br>No., % | VASQIP Cohort<br>(n=65,188)<br>No., % |
|------------------------------------------|------------------------------------|---------------------------------------|
| <b>Follow up in months (median, IQR)</b> | 61.3 (24.4, 114.6)                 | 57.2 (22.0,107.0)                     |
| <b>Age, years</b>                        |                                    |                                       |
| Median (IQR)                             | 66.0 (60.0, 72.0)                  | 65.0 (59.0, 71.0)                     |
| <60                                      | 3,348 (23.6)                       | 16,334 (25.1)                         |
| 60-69                                    | 6,137 (43.3)                       | 28,495 (43.7)                         |
| ≥70                                      | 4,694 (33.1)                       | 20,359 (31.2)                         |
| <b>Sex</b>                               |                                    |                                       |
| Male                                     | 13,472 (95.0)                      | 61,802 (94.8)                         |
| Female                                   | 707 (5.0)                          | 3,386 (5.2)                           |
| <b>Race/ethnicity</b>                    |                                    |                                       |
| Hispanic                                 | 641 (4.5)                          | 2,843 (4.4)                           |
| Non-Hispanic Black                       | 1,782 (12.6)                       | 8,860 (13.6)                          |
| Non-Hispanic White                       | 10,168(71.7)                       | 48,139 (73.8)                         |
| Other <sup>b</sup>                       | 865 (6.0)                          | 3,325 (5.1)                           |
| Missing                                  | 732 (5.2)                          | 2,021 (3.1)                           |
| <b>Year of TKA Surgery</b>               |                                    |                                       |
| 1999-2004                                | 3,410 (24.0)                       | 9,189 (14.1)                          |
| 2005-2009                                | 2,649 (18.7)                       | 16,118 (24.7)                         |
| 2010-2014                                | 3,938 (27.8)                       | 19,537 (30.0)                         |
| 2015-2019                                | 4,182 (29.5)                       | 20,344 (31.2)                         |
| <b>Urban vs rural center</b>             |                                    |                                       |
| Rural                                    | 115 (0.8)                          | 2,436 (3.7)                           |
| Urban                                    | 14,063 (99.2)                      | 62,745 (96.3)                         |
| <b>Body mass index</b>                   |                                    |                                       |
| <25.0                                    | 1,032 (7.9)                        | 4,563 (7.2)                           |
| 25.0-29.9                                | 3,943 (30.0)                       | 18,171 (28.7)                         |
| 30.0-39.9                                | 7,316 (55.8)                       | 35,999 (56.9)                         |
| ≥40                                      | 831 (6.3)                          | 4,556 (7.2)                           |
| <b>Tobacco use</b>                       |                                    |                                       |
| Never or former smoker                   | 10,180 (73.5)                      | 46,671 (72.4)                         |
| Current smoker                           | 3,678 (26.5)                       | 17,756 (27.6)                         |
| <b>Comorbidities<sup>c</sup></b>         |                                    |                                       |
| Alcohol dependence/abuse                 | 1,140 (8.1)                        | 5,296 (8.1)                           |
| Heart failure                            | 700 (5.0)                          | 3,139 (4.8)                           |
| Hypertension                             | 11,953 (84.7)                      | 56,101 (86.3)                         |
| Peripheral artery disease                | 682 (4.8)                          | 3,133 (4.8)                           |
| HIV infection                            | 22 (0.2)                           | 111 (0.2)                             |
| Hepatitis C virus infection              | 436 (3.1)                          | 2,073 (3.2)                           |
| Hepatitis B virus infection              | 23 (0.2)                           | 97 (0.1)                              |
| Autoimmune inflammatory arthritis        | 440 (3.1)                          | 1,786 (2.7)                           |
| Anemia                                   | 779 (5.6)                          | 3,230 (5.0)                           |
| Diabetes mellitus                        | 1,285 (9.1)                        | 4,317 (6.6)                           |
| Chronic kidney disease                   | 2,530 (18.3)                       | 11,873 (18.4)                         |

Abbreviations:No., number; IQR, interquartile range; TKA, total knee arthroplasty; HIV, Human Immunodeficiency Virus; VASQIP, Veterans Affairs Surgical Quality Improvement Program.

<sup>a</sup>Table only includes characteristics of data available outside of VASQIP

<sup>b</sup> Other race included Asian, American Indian or Alaska native, native Hawaiian or other Pacific Islander, or multiracial.

<sup>c</sup>Anemia was defined as a hemoglobin <12 g/dL. Chronic kidney disease was defined by an estimated glomerular filtration rate (eGFR) of <60 (mL/min/1.73 m<sup>2</sup>). eGFR was calculated using the Modification of Diet in Renal Disease equation:  $175 \times (\text{serum creatinine})^{-1.154} \times (\text{age})^{-0.203} \times (0.742, \text{ if female}) \times (1.212, \text{ if Black})$ . Alcohol abuse, heart failure, hypertension, diabetes mellitus, peripheral artery disease, HIV infection, hepatitis B virus infection, and hepatitis C virus infection were defined by 1 inpatient or 2 outpatient ICD-9/-10 diagnosis codes. Autoimmune inflammatory arthritis was defined as 1 inpatient or 2 outpatient ICD-9/-10 diagnosis codes among patients with at least one outpatient rheumatologic clinic visit during the baseline period. ICD-9/10 diagnosis codes used to identify comorbidities are included in **eTable2**

**eTable 4.** Adjusted incidence rate ratios of prosthetic joint infection at any time after primary total knee arthroplasty associated with demographic, baseline clinical, and peri-operative factors among patients included in the Veterans Affairs Surgical Quality Improvement Project (n=61,701).

| Characteristic                            | Adjusted Incidence Rate Ratio (95% CI) <sup>a</sup> |
|-------------------------------------------|-----------------------------------------------------|
| <b>Age</b>                                |                                                     |
| <60                                       | Ref                                                 |
| 60-69                                     | 0.9 (0.8-1.0)                                       |
| ≥70                                       | 0.8 (0.7-0.9)                                       |
| <b>Urban vs rural center</b>              |                                                     |
| Rural                                     | Ref                                                 |
| Urban                                     | 1.7 (1.4-2.2)                                       |
| <b>Body mass index (kg/m<sup>2</sup>)</b> |                                                     |
| <25.0                                     | Ref                                                 |
| 25.0-29.9                                 | 0.9 (0.8-1.2)                                       |
| 30.0-39.9                                 | 1.0 (0.8-1.2)                                       |
| ≥40                                       | 1.3 (1.0-1.7)                                       |
| <b>Alcohol dependence/abuse</b>           |                                                     |
| No                                        | Ref                                                 |
| Yes                                       | 1.5 (1.3-1.9)                                       |
| <b>Tobacco use</b>                        |                                                     |
| Former/never                              | Ref                                                 |
| Current                                   | 1.1 (1.0-1.2)                                       |
| <b>Heart failure</b>                      |                                                     |
| No                                        | Ref                                                 |
| Yes                                       | 1.7 (1.4-2.2)                                       |
| <b>Hypertension</b>                       |                                                     |
| No                                        | Ref                                                 |
| Yes                                       | 1.3 (1.1-1.6)                                       |
| <b>Peripheral artery disease</b>          |                                                     |
| No                                        | Ref                                                 |
| Yes                                       | 1.8 (1.4-2.2)                                       |
| <b>Hepatitis C virus infection</b>        |                                                     |
| No                                        | Ref                                                 |
| Yes                                       | 2.0 (1.6-2.5)                                       |
| <b>Autoimmune inflammatory arthritis</b>  |                                                     |
| No                                        | Ref                                                 |
| Yes                                       | 2.2 (1.7-2.7)                                       |
| <b>Anemia</b>                             |                                                     |
| No                                        | Ref                                                 |
| Yes                                       | 1.8 (1.5-2.2)                                       |
| <b>Anesthesia type</b>                    |                                                     |
| Regional                                  | Ref                                                 |
| General                                   | 1.1 (0.9-1.3)                                       |
| <b>Operative time</b>                     |                                                     |
| <2 hours                                  | Ref                                                 |
| ≥2 hours                                  | 1.2 (1.1-1.4)                                       |

Abbreviations: Ref, reference; CI, confidence interval.

<sup>a</sup>Incidence rate ratios for each variable were adjusted for all other variables as well as for VA site and year of TKA (categorized in 5-year periods from 1999-2019).
